# Supplementary material
Source: PubMed Central journal article supplement (PMC4579572)
Supplement: NIHMS63527-supplement-1.pdf [file NIHMS63527-supplement-1.pdf]

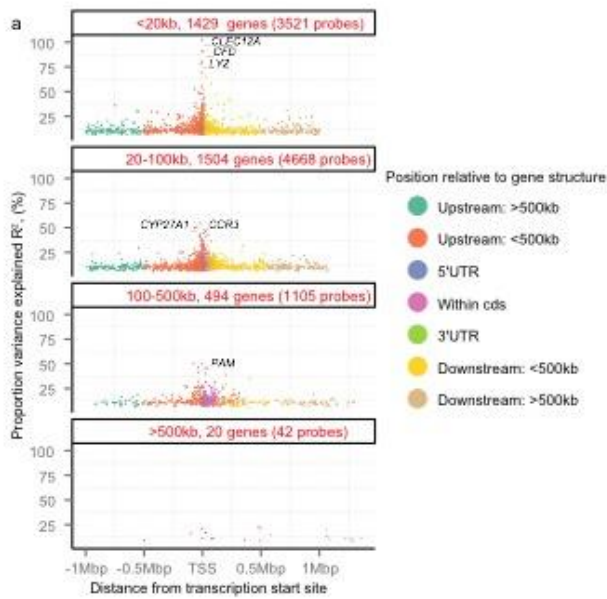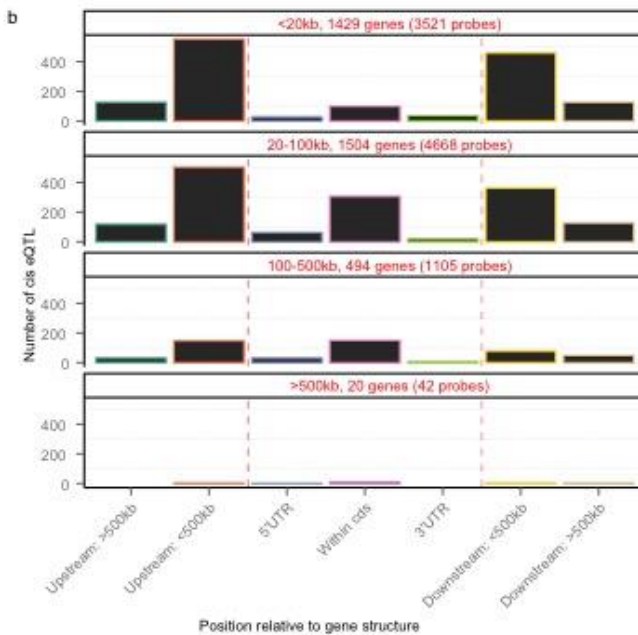

**Supplementary Figure 1. Effect size and location of *cis* eQTL in neutrophils relative to transcription start site (TSS) (a) or gene structure (b), partitioned by gene size.** Each point in (a) denotes the peak eQTL for a gene and is plotted according to the proportion of variance explained by the variant with strongest statistical association with gene expression and location of the variant relative to the TSS. Several genes with large effect sizes are annotated. (b) shows the number of *cis* eQTL identified in neutrophils according to the location of the peak eQTL relative to gene structures.

Network a

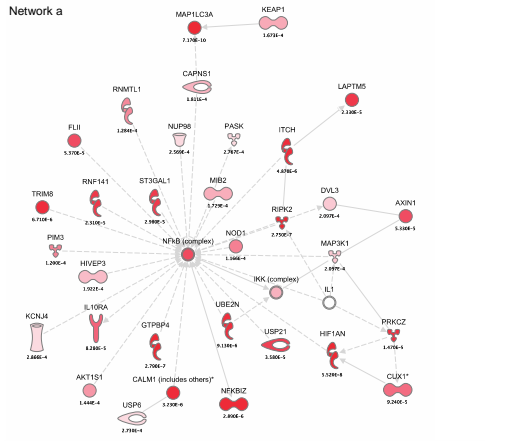

Network b

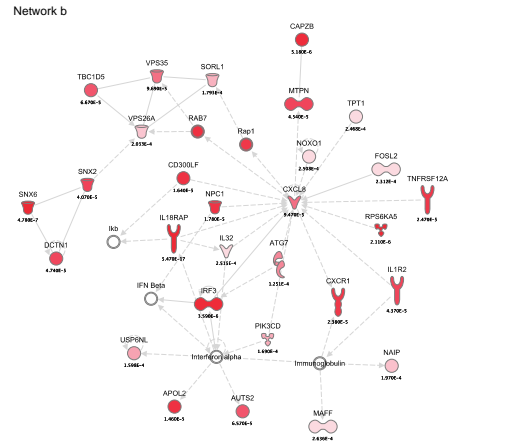

Network c

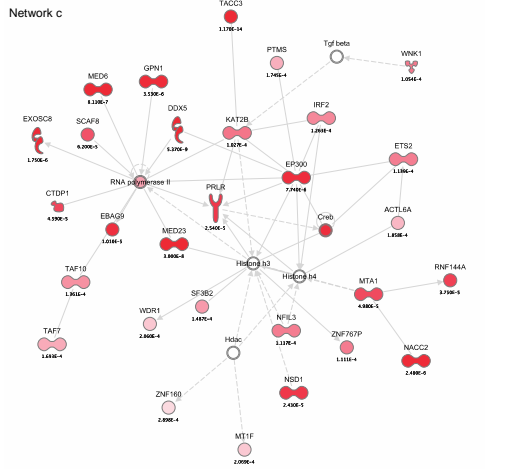

Network d

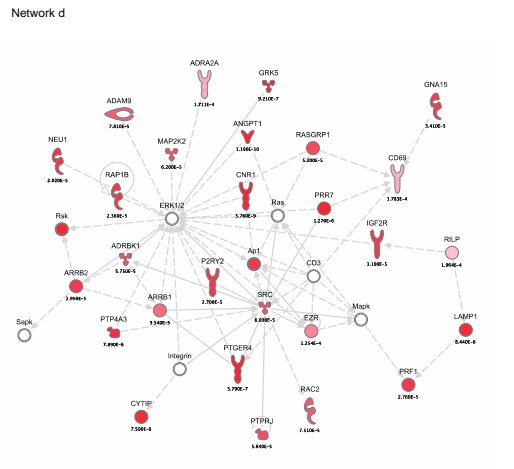

Network e

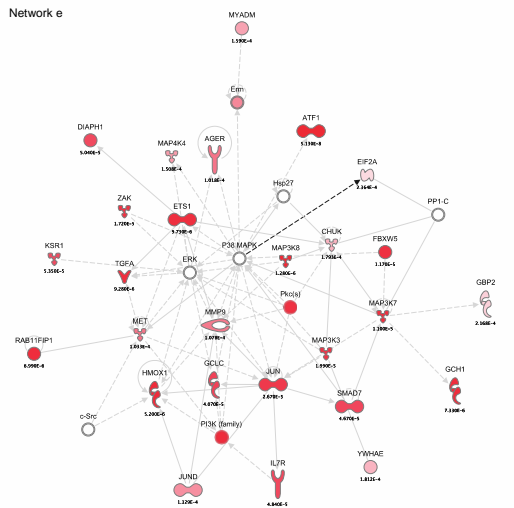

Network f

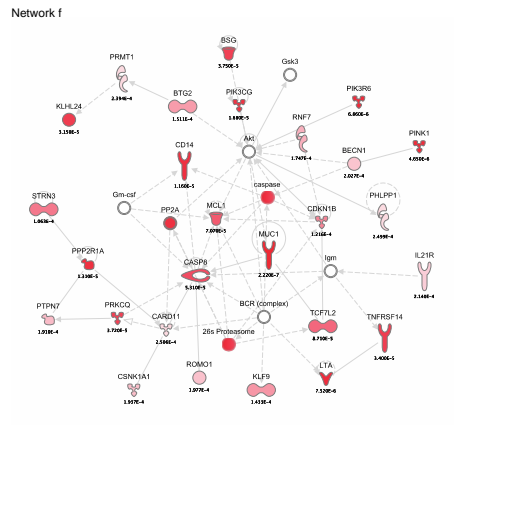

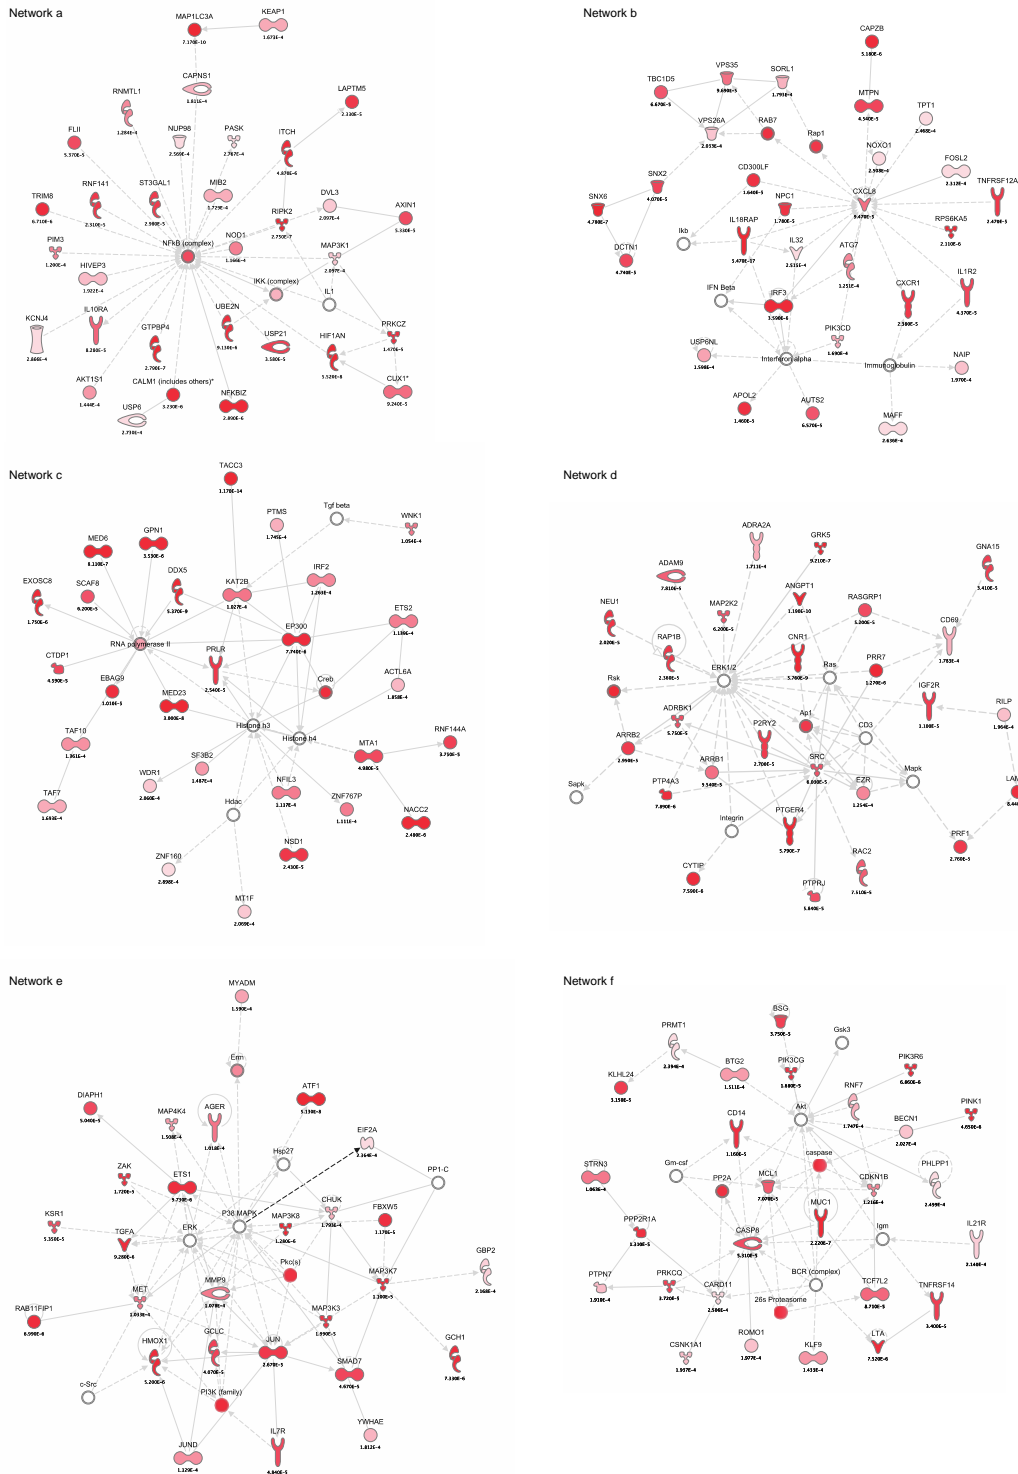

**Supplementary Figure 2. Pathway analysis of genes with neutrophil specific *cis* eQTL.** Amongst 975 genes with an eQTL in neutrophils only, a number of gene networks are identified as enriched for the genes showing *cis* eQTL specific to neutrophils (top 10 shown here with intensity of red shading related to p value of eQTL, gene names and p values shown above and below

molecular symbol). Network a ( $p=1 \times 10^{-36}$ , Fishers exact test) involves genes associated with NF $\kappa$ B such as *MAP1LC3A* encoding LC3 involved in autophagy ( $p=7.1 \times 10^{-10}$ ), *TRIM8* ( $p=6.7 \times 10^{-6}$ ) which modulates p53 activity and *CALM1* (calmodulin 1) ( $p=3.2 \times 10^{-6}$ ); network b ( $p=1 \times 10^{-30}$ ) involving *CXCL8* (IL8) ( $p=9.5 \times 10^{-5}$ ) a critical modulator of neutrophil recruitment and behaviour with associated genes showing eQTL including *IRF3* ( $p=3.6 \times 10^{-6}$ ), *IL18RAP* ( $p=5.5 \times 10^{-17}$ ) and *CXCR1* (IL8 receptor) ( $p=2.4 \times 10^{-5}$ ); network c ( $p=1 \times 10^{-30}$ ) centred on histones H3 and H4; network d ( $p=1 \times 10^{-26}$ ) involving genes linked with ERK1/2 MAP kinases; network e ( $p=1 \times 10^{-26}$ ) also focused on ERK and P38 MAPK and involving a network of genes including many transcription factors such as *ETS1* ( $p=9.7 \times 10^{-6}$ ), *ATF1* ( $p=5.1 \times 10^{-8}$ ) and *JUN* ( $p=2.7 \times 10^{-5}$ ); network f ( $p=1 \times 10^{-26}$ ) involving Akt and caspases; network g ( $p=1 \times 10^{-26}$ ) including eQTL involving *ATM* ( $p=1.5 \times 10^{-18}$ ), heat shock proteins *HSPA1A* and *HSPA1B* ( $p=1 \times 10^{-6}$ ) and *MCM5* ( $p=3.4 \times 10^{-11}$ ); network h ( $p=1 \times 10^{-23}$ ), network i ( $p=1 \times 10^{-19}$ ) involving genes linked to the nuclear transcriptional regulator NURP1 (also known as p8) showing eQTL such as the phospholipid gene *PCTP* ( $p=9.5 \times 10^{-13}$ ); and network j ( $p=1 \times 10^{-18}$ ) involving IL12, PI3K and TCR which includes genes showing *cis*-eQTL such as *STAT5A* ( $p=1.9 \times 10^{-5}$ ) important in GM-CSF signaling and control of granulocyte homeostasis<sup>69</sup> and *IDO1* ( $p=4.8 \times 10^{-6}$ ) which has a role in neutrophil self-regulation through tryptophan catabolism<sup>70</sup>.

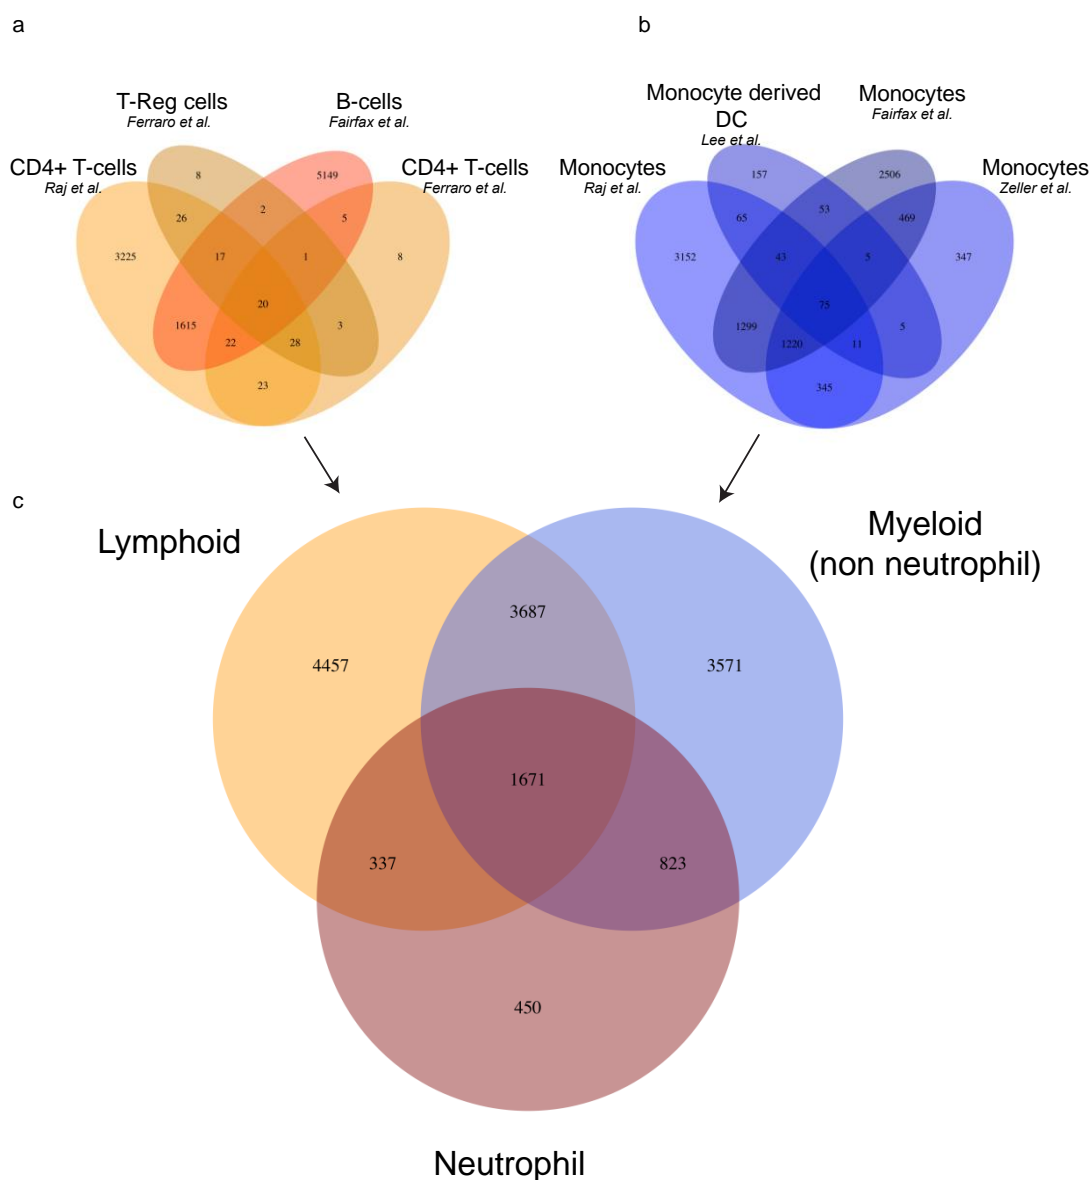

**Supplementary Figure 3. Euler diagrams showing overlap of genes with an eQTL previously observed in lymphoid (a) or myeloid (b) cell types and their overlap with genes with eQTL in neutrophils (c). We extracted lists of genes reported to have a significant eQTL from several previous studies and show the number of overlapping or non-overlapping genes for the four studies reporting eQTL in lymphoid cells<sup>14,15,17</sup> (a) or myeloid cells<sup>13-16</sup> (b). Overlapping the lists of genes from A and B, with the list of 3281 genes with an eQTL in neutrophils yields panel with number of overlapping genes noted (c).**

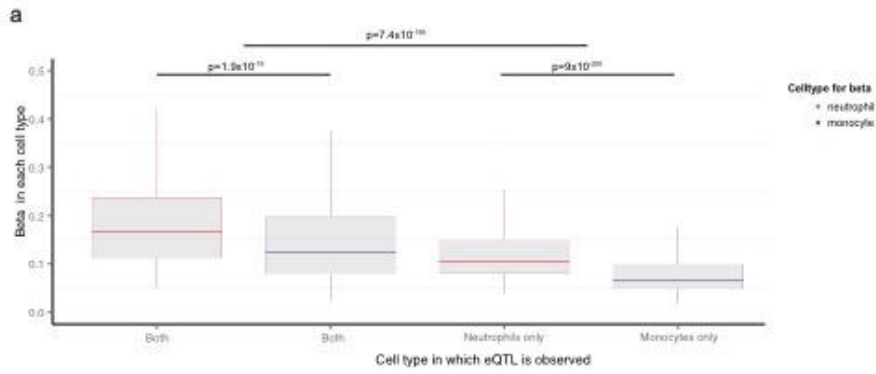

**Supplementary Figure 4: Effect sizes of eQTL.** These tend to be larger for eQTL that are observed in both cell types (labelled as both) or those seen in one cell type only and are larger in neutrophils than monocytes regardless of whether the eQTL is observed in both cell types or one only. Box lower and upper border denote 25<sup>th</sup> and 75<sup>th</sup> centiles respectively, central line denotes median and whiskers extend to 1.5\*IQR

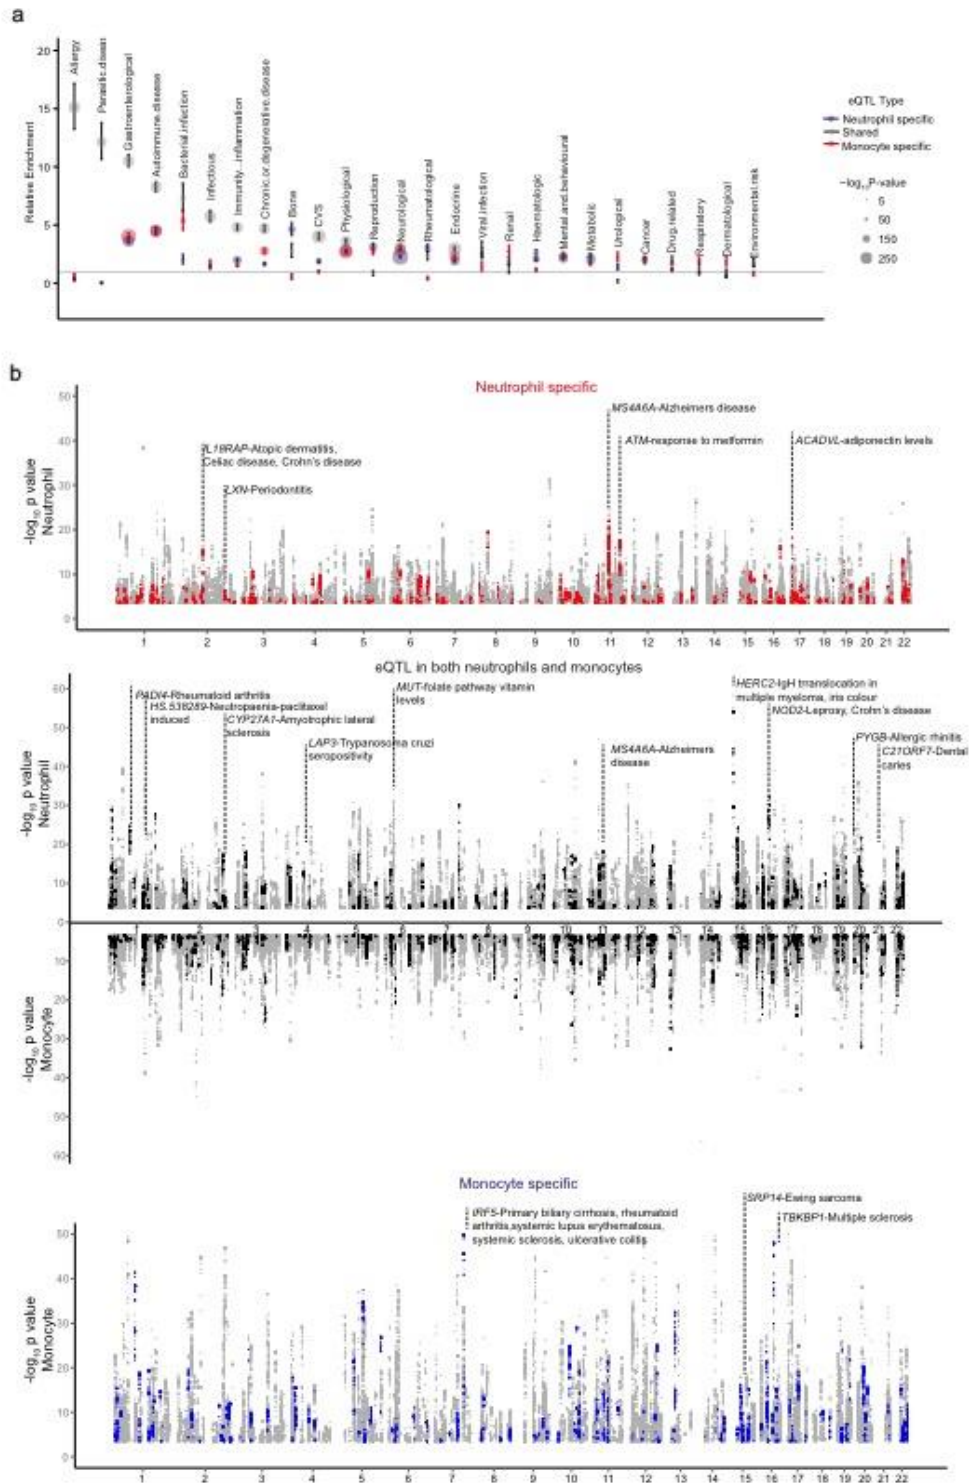

**Supplementary Figure 5: Shared and cell type specific *cis* eQTL are enriched for variants associated with diseases or traits in GWAS studies.** (a) Enrichment of shared and cell type specific eQTL for variants reported in the GWAS catalog as associated with a trait or disease by GWAS ontology category. For each category we compared the proportion of eQTL

variants associated with a trait in the relevant category to the proportion of all variants tested that had this property by a Fisher's exact test. Tails show 95% CI of the enrichment estimate (b) Manhattan plots demonstrating significant (all FDR<0.05) shared (black), neutrophil-specific (red) or monocyte-specific (blue) eQTL that are either associated with a trait in the GWAS catalog (color) or not (grey). An arbitrary selection of diseases for which the risk variant (or a variant in linkage disequilibrium  $r^2>0.8$ ) is also an eQTL are highlighted.
